# Supplementary material for: Study Protocol for the Evaluation of the Health Effects of Superblocks in Barcelona: The “Salut Als Carrers” (Health in the Streets) Project
Source: MDPI journal article supplement (doi:10.3390/ijerph17082956), 2020-04-24
Supplement: s1 [file s1]

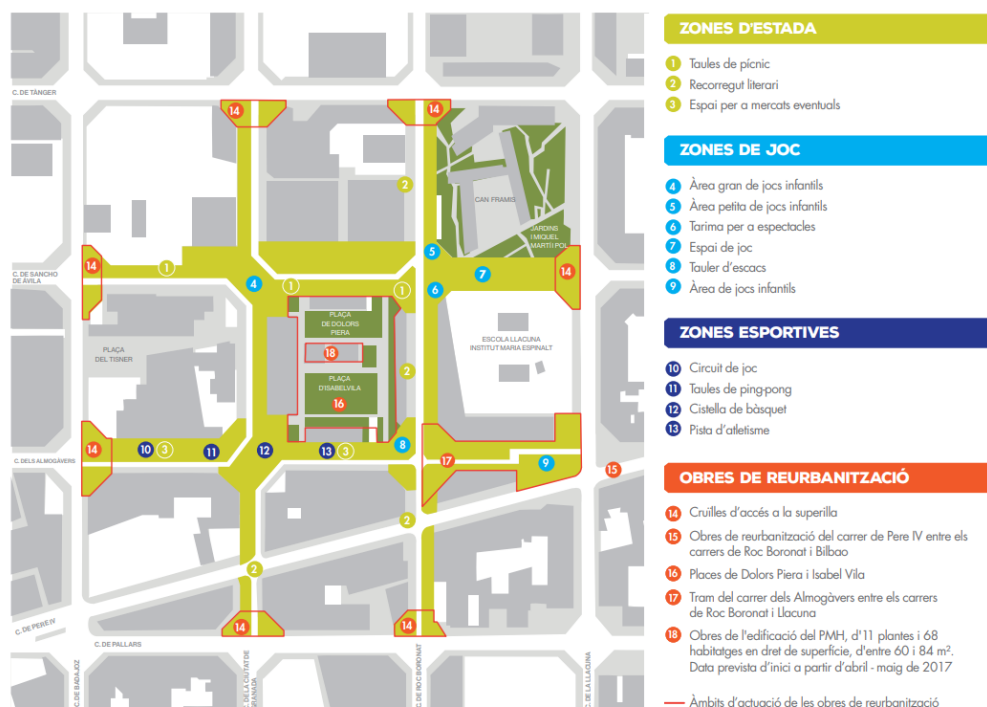

**Figure A1.** Interventions performed at the superblock of Poblenou in four categories (recreational areas, play areas, sports areas, and urban renewal locations). Source: [Informative leaflet about definitive mobility in the Superblock of Poblenou] (Ajuntament de Barcelona 2017).

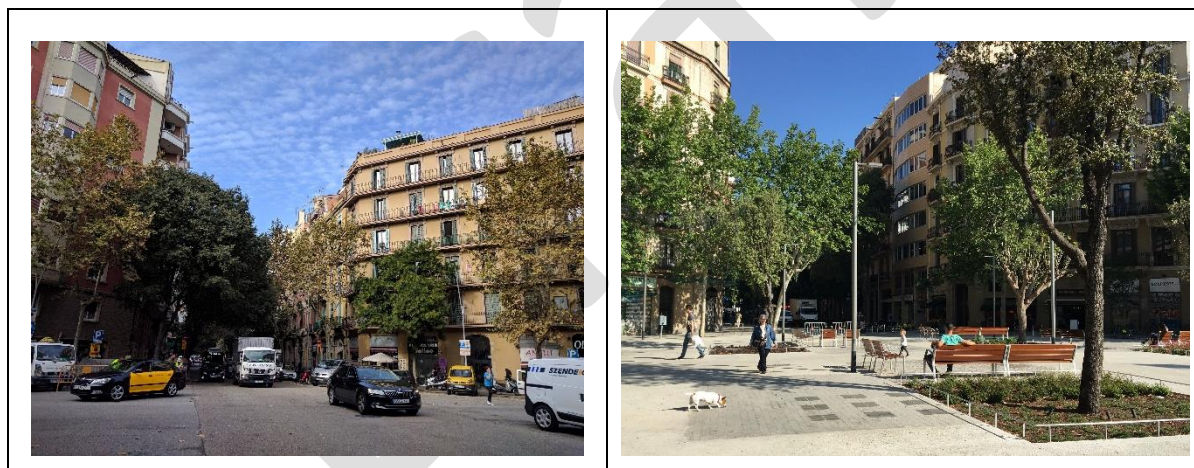

**Figure A2.** Plaça del mercat (newly created plaza in Sant Antoni neighbourhood, right) and crossing similar to what it was before (Mansó with Viladomat streets, left).

## Air quality measurement points in Horta

ISGlobal

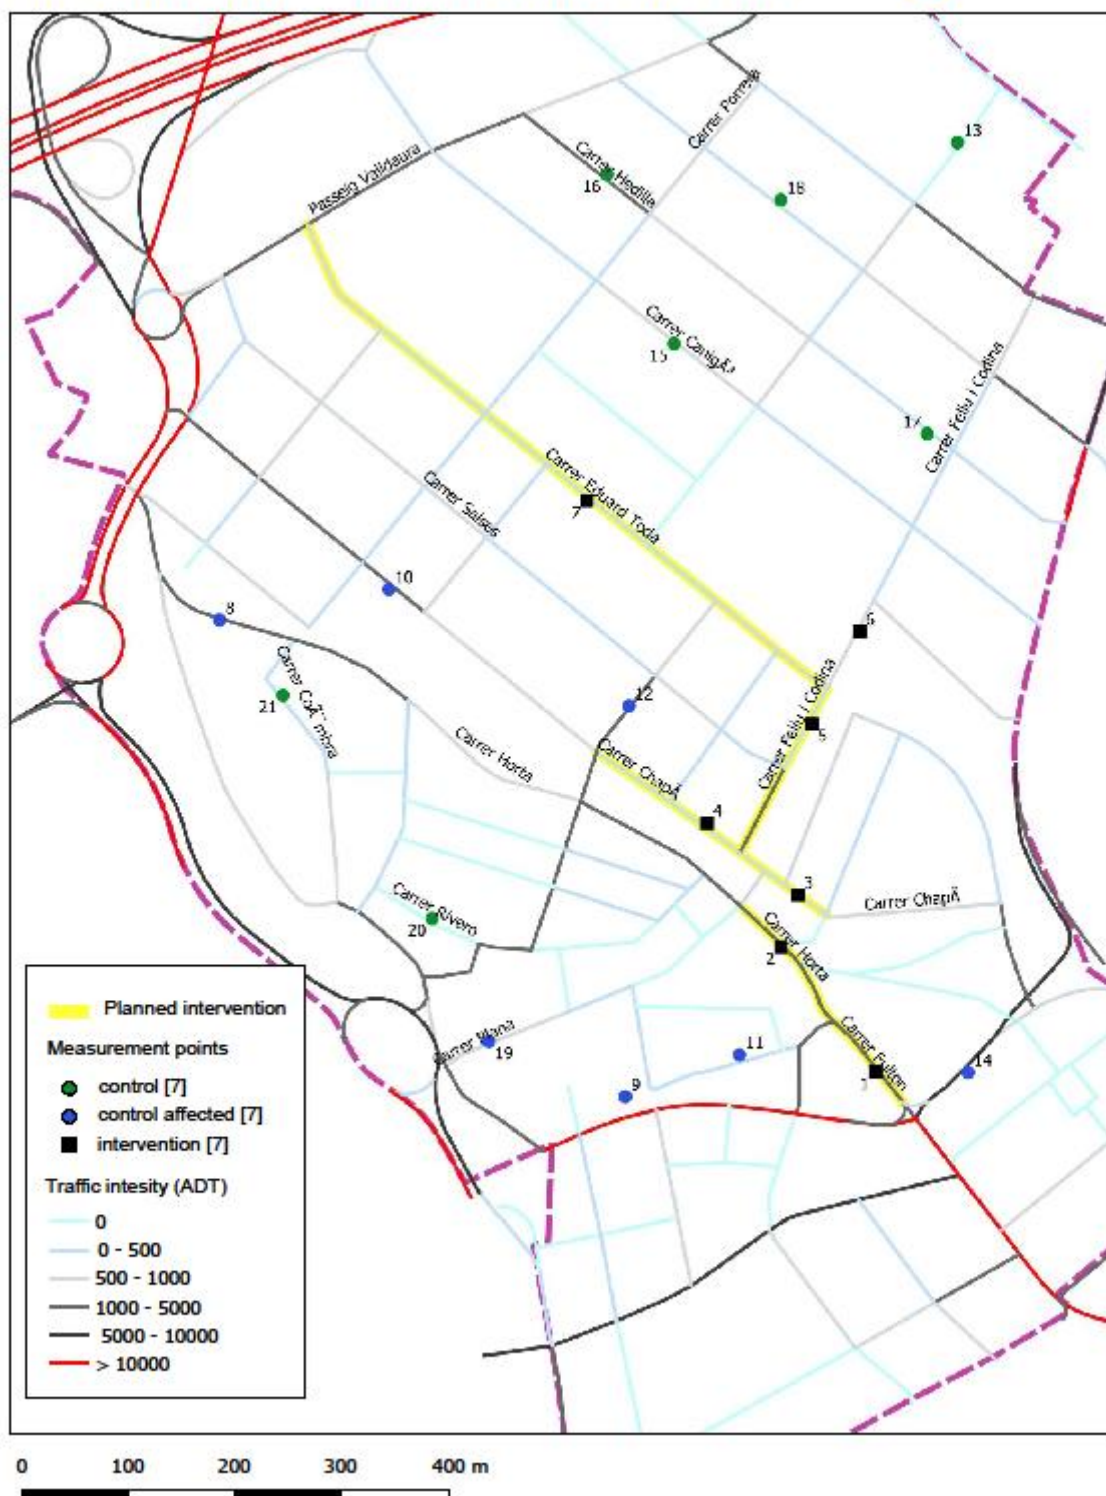

Figure A3. Black carbon measurements in the Horta superblock. Source: ISGlobal 2018.

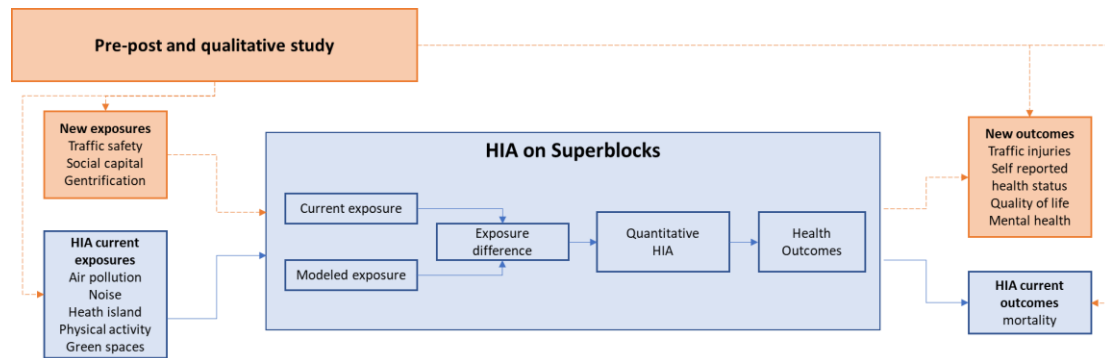

**Figure A4.** Health impact assessment (HIA) improvements provided by a pre-post assessment and qualitative study presented in this protocol. Note: Orange boxes and dotted lines show the areas of improvement / blue boxes and continuous lines showed current HIA. HIA: health impact assessment.
